# Supplementary material for: The reaction mechanism for the SCR process on monomer V5+sites and the effect of modified Brønsted acidity
Source: Royal Society of Chemistry journal article supplement (doi:10.1039/c6cp02274j), 2016-01-01
Supplement: c6cp02274j1.pdf [file c6cp02274j1.pdf]

# Reaction Mechanism for the SCR Process on monomer V<sup>5+</sup> sites and Effect of Modified Brønsted Acidity

Logi Arnarson<sup>1,2</sup> Hanne Falsig<sup>2</sup>, Søren B. Rasmussen<sup>2</sup>, Jeppe V. Lauritsen<sup>1</sup> and Poul Georg Moses<sup>2</sup>

<sup>1</sup>Interdisciplinary Nanoscience Center, Aarhus University, DK-8000 Aarhus C, Denmark

<sup>2</sup>Haldor Topsøe A/S, Haldor Topsøes Allé 1, DK-2800 Kongens Lyngby, Denmark

## Supporting Information

# 1. Cartesian coordinates of initial state structure VO<sub>3</sub>H/TiO<sub>2</sub>(001)

Positions:

|       |         |         |         |
|-------|---------|---------|---------|
| 0 Ti  | 1.8700  | 1.8777  | 12.9420 |
| 1 Ti  | 0.0000  | 1.9050  | 10.5954 |
| 2 Ti  | 1.7298  | -0.0137 | 15.2908 |
| 3 O   | 0.0000  | 0.0000  | 10.0838 |
| 4 O   | 1.4437  | 1.8918  | 14.8298 |
| 5 O   | -0.0267 | 1.8938  | 12.5224 |
| 6 O   | 1.9485  | -0.0246 | 13.3449 |
| 7 O   | 1.9050  | 1.9050  | 10.9977 |
| 8 O   | 0.0480  | -0.1779 | 16.0255 |
| 9 Ti  | 1.9165  | 5.6888  | 12.9490 |
| 10 Ti | 0.0000  | 5.7150  | 10.5954 |
| 11 Ti | 1.7920  | 3.7635  | 15.2970 |
| 12 O  | 0.0000  | 3.8100  | 10.0838 |
| 13 O  | 2.0050  | 5.6918  | 14.9574 |
| 14 O  | 0.0020  | 5.7010  | 12.5596 |
| 15 O  | 1.9801  | 3.7951  | 13.3593 |
| 16 O  | 1.9050  | 5.7150  | 10.9977 |
| 17 O  | 0.0404  | 3.9646  | 15.9645 |
| 18 Ti | 5.6920  | 1.8661  | 13.0703 |
| 19 Ti | 3.8100  | 1.9050  | 10.5954 |
| 20 Ti | 5.9313  | 0.0036  | 15.6751 |
| 21 O  | 3.8100  | 0.0000  | 10.0838 |
| 22 O  | 5.6908  | 1.9098  | 15.0310 |
| 23 O  | 3.8288  | 1.8911  | 12.5730 |
| 24 O  | 5.7618  | -0.0388 | 13.5282 |
| 25 O  | 5.7150  | 1.9050  | 10.9977 |
| 26 O  | 3.1475  | 0.4714  | 16.2517 |
| 27 Ti | 5.6974  | 5.7375  | 12.9966 |
| 28 Ti | 3.8100  | 5.7150  | 10.5954 |
| 29 Ti | 5.9410  | 3.8996  | 15.5387 |
| 30 O  | 3.8100  | 3.8100  | 10.0838 |
| 31 O  | 5.4961  | 5.7364  | 15.2634 |
| 32 O  | 3.8286  | 5.7106  | 12.5335 |
| 33 O  | 5.7765  | 3.8668  | 13.5521 |
| 34 O  | 5.7150  | 5.7150  | 10.9977 |
| 35 O  | 3.2714  | 3.2738  | 16.1955 |
| 36 V  | 4.0198  | 1.8241  | 17.2781 |
| 37 O  | -2.1998 | 0.5962  | 17.3505 |
| 38 O  | 10.8847 | 1.8372  | 18.7441 |
| 39 O  | 5.4353  | 3.3261  | 17.4048 |
| 40 H  | 6.2035  | 3.0655  | 17.9415 |

2. Frequencies (given in  $\text{cm}^{-1}$ ) used to calculate the Gibbs free energy. The frequencies were calculated for atoms marked in black.

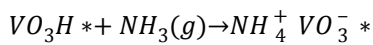

H: [491.5,806.6,3647.8]

$NH_4^+$ :

[90.5,119.0,187.7,254.4,304.3,426.8,1410.2,1486.0,1508.9,1699.1,1722.9,3012.0,3073.8,3426.4,3525.5]

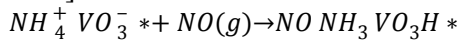

NO  $NH_3$ :

[95.0,135.4,192.2,236.9,416.1,576.7,1042.5,1603.4,1634.4,3386.5,3538.8,3585.0,25.2,65.0,90.3,107.4,347.4,1834.0,491.5,806.6,3647.8]

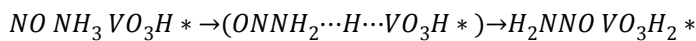

$ONNH_2 \cdots H$  H:

[491.5,806.6,3647.8,14.1,35.9,73.1,83.0,145.1,384.6,423.5,476.6,629.6,970.2,1054.2,1425.4,1467.9,1556.8,1609.6,3405.0,3518.2]

$H_2NNO$  H:

[27.0,57.7,66.8,85.5,150.4,522.3,624.8,665.4,750.5,850.6,1073.5,1217.3,1524.5,1598.4,3326.0,3485.7,3646.8,491.5,806.6,3647.8]

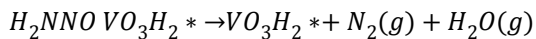

$H_2$ : [391.1,796.1,3646.3,491.5,806.6,3647.8]

### 3. PDOS for V, Mo and W as substitutional dopants.

When V is substitutional doped at the Brønsted acid site (Figure 1 a-d)) it is reduced to oxidation state +4 and it is the V atom in the active site that is redox active as it changes oxidation state from +5 to +4 during the reduction.

When Mo and W are substitutional doped at Brønsted acid site (Figure 1 e-h) and i-l) respectively) they become the redox active sites changes oxidation states whereas the V atom in the active site remains in the same oxidation state.

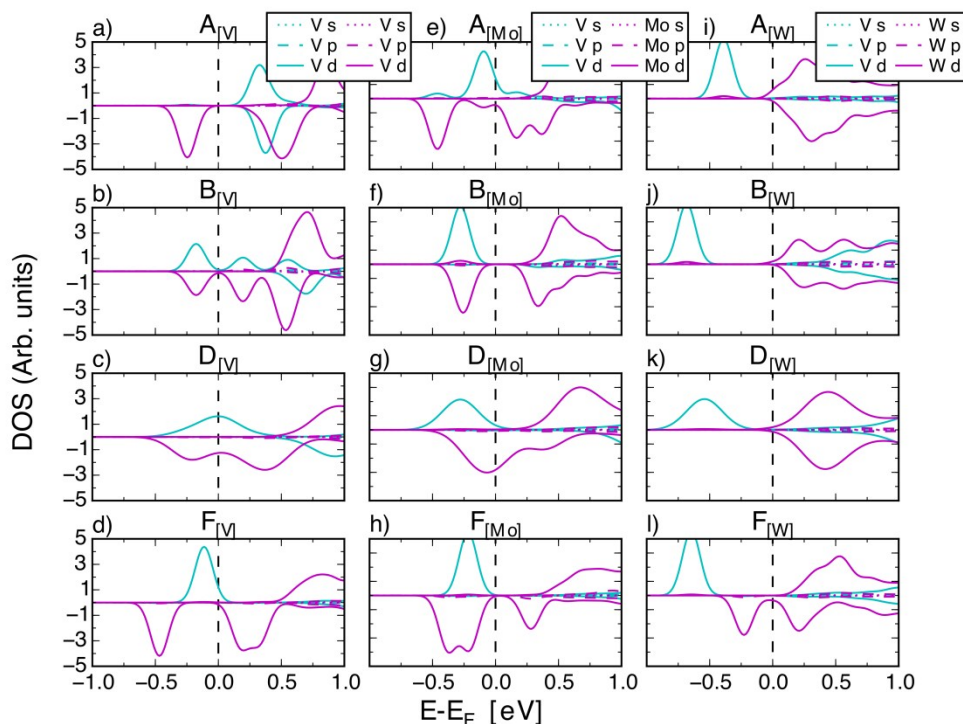

Figure 1: PDOS for s, p and d orbitals of V in the active site (blue) and a)-d)V , e)-h)Mo and i)-l) W as substitution for states A, B, D and F (purple).

When V is substitutional doped at the H accepting site (Figure 2 a-d)) both V atoms are partially reduced in states A,B and D. In the reduced state the V atom of the active site is reduced to +4 and the V atom in the TiO<sub>2</sub> lattice as well.

When Mo and W are substitutional doped at H accepting site (Figure 2 e-h) and i-l) respectively) they become the redox active sites changes oxidation states whereas the V atom in the active site remains in the same oxidation state

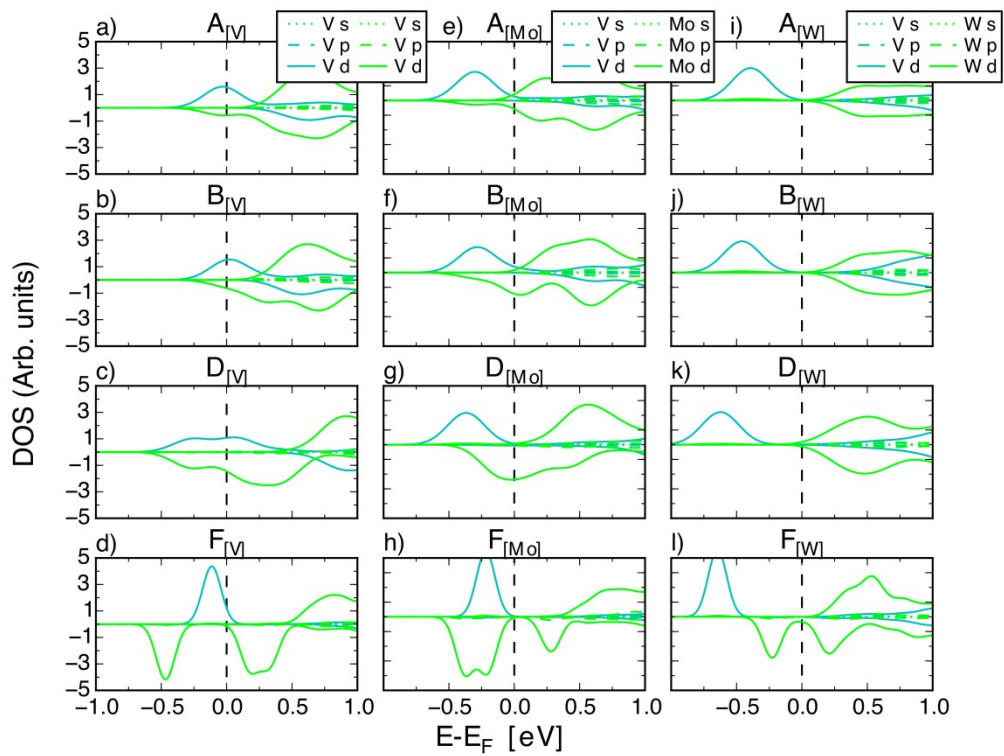

Figure 2: PDOS for s, p and d orbitals of V in the active site (blue) and a)-d)V, e)-h)Mo and i)-l) W as substitution for states A, B, D and F (green).
